# Supplementary material for: Genetic map‐guided genome assembly reveals a virulence‐governing minichromosome in the lentil anthracnose pathogen Colletotrichum lentis
Source: PubMed Central journal article supplement (PMC6668012; doi:10.1111/nph.15369), 2018-08-04
Supplement: NPH-221-431-s001.pdf [file NPH-221-431-s001.pdf]

## ***New Phytologist* Supporting Information**

**Article title: Genetic map-guided genome assembly reveals a virulence-governing minichromosome in the lentil anthracnose pathogen *Colletotrichum lentis***

Authors: Vijai Bhadauria, Ron MacLachlan, Curtis Pozniak, Aurelie Cohen-Skalie, Li Li, Jerlene Halliday, Sabine Banniza

Article acceptance date: 02 July 2018

The following Supporting Information is available for this article:

### **Figs S1-S4**

**Fig. S1** Comparative analysis of secondary metabolite backbone genes in *Colletotrichum* species. PKS, Polyketide synthase; NRPS, Non-ribosomal peptide synthetase; PKS-NRPS, hybrid PKS-NRPS; and DMAT, Dimethylallyl tryptophan synthase.

**Fig. S2** Validation of the genetic linkage map of ascospore-derived isolates originated from a cross between *Colletotrichum lentis* isolates CT-30 and CT-21. 2D-CheckMatrix heat plots were generated using the CheckMatrix python script (Kozik & Michelmore, 2006). Each heat plot represents a linkage group. SNP markers are lined up against each other. A red block along the lines indicates tightly linked markers with low recombination. Panels beneath heat maps show the proportion of parental alleles (Red = CT-30, Blue = CT-21). Yellow (CT-30) and light blue (CT-21) colors in the middle represent segregation distortion.

**Fig. S3** Genetic and QTL mapping. (a) A side-by-side comparison of genetic maps generated by MadMapper ([Kozik & Michelmore, 2006](#)) and R/qtl (Broman *et al.*, 2003). (b) Mapping of QTLs controlling *Colletotrichum lentis* virulence on lentil using R/qtl. Red, blue and green dotted lines represent LOD (log of the odds) score thresholds at 0.1, 0.05 and 0.01 significance levels, respectively.

**Fig. S4** *Colletotrichum lentis* minichromosome 11. Bottom, middle and top frames of the figure show GC content, gene density and QTL (*qCIVIR11*) position.

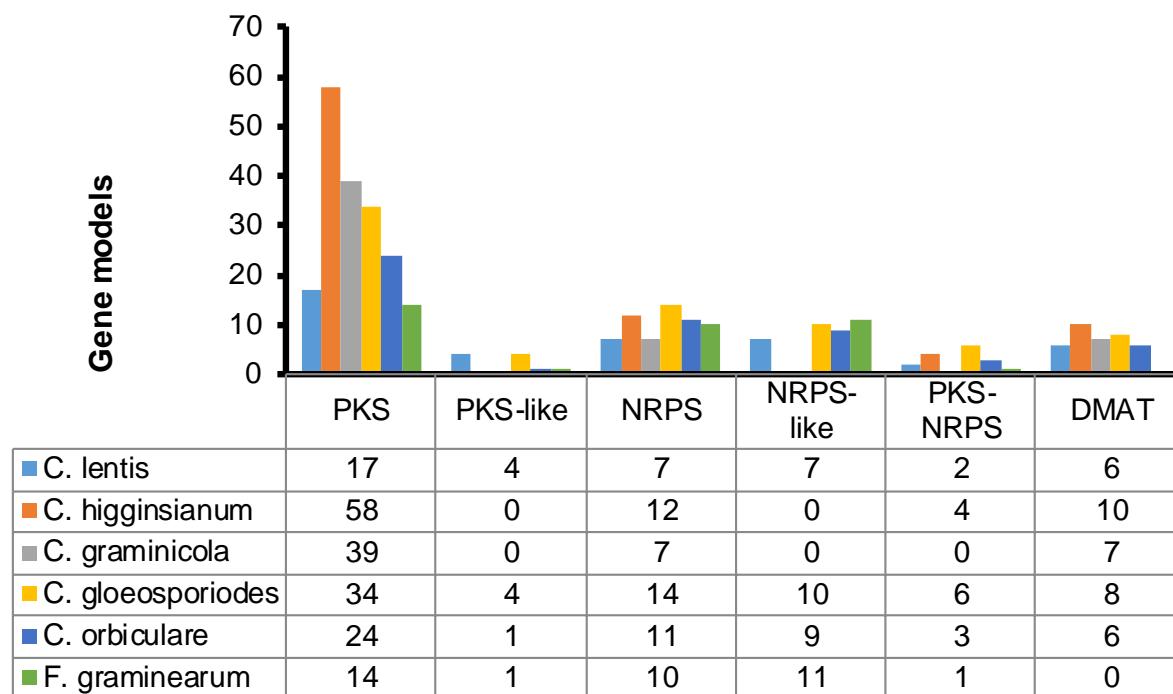

**Fig. S1** Comparative analysis of secondary metabolite backbone genes in *Colletotrichum* species. PKS, Polyketide synthase; NRPS, Non-ribosomal peptide synthetase; PKS-NRPS, hybrid PKS-NRPS; and DMAT, Dimethylallyl tryptophan synthase.

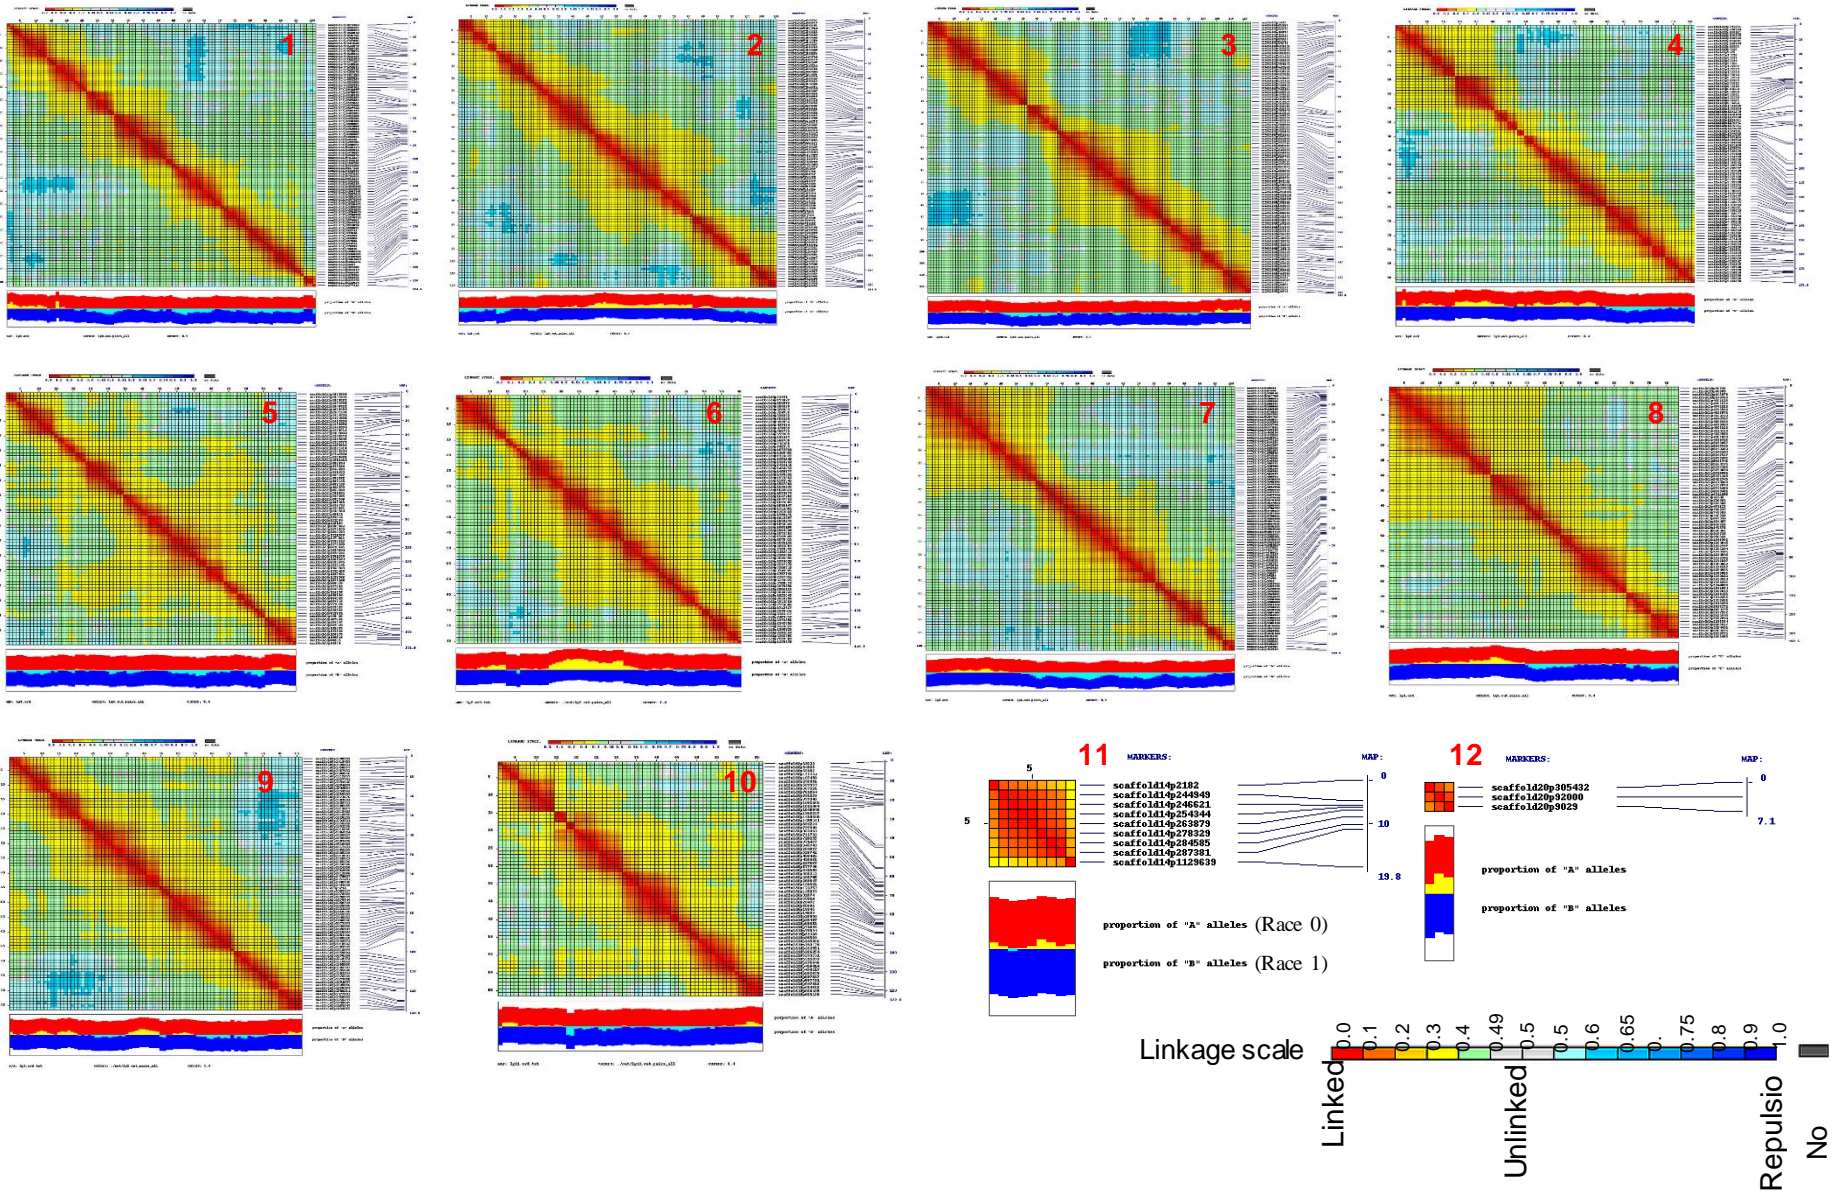

**Fig. S2** Validation of the genetic linkage map of ascospore-derived isolates originated from a cross between *Colletotrichum lentis* isolates CT-30 and CT-21. 2D-CheckMatrix heat plots were generated using the CheckMatrix python script (Kozik & Michelmore, 2006). Each heat plot represents a linkage group.

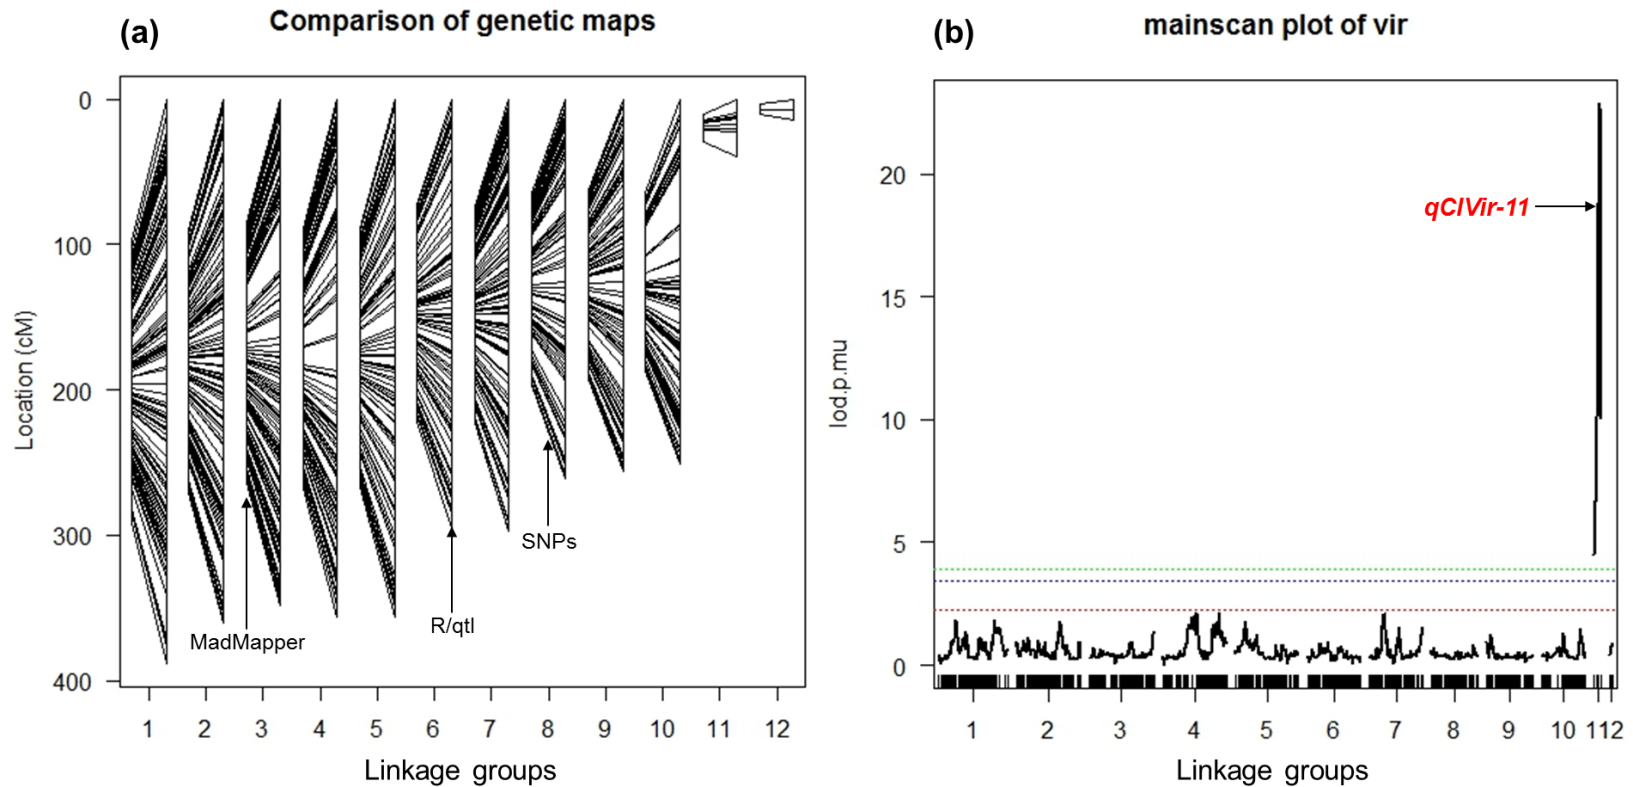

**Fig. S3** Genetic and QTL mapping. (a) A side-by-side comparison of genetic maps generated by MadMapper (Kozik & Michelmore, 2006) and R/qtl (Broman *et al.*, 2003). (b) Mapping of QTLs controlling *Colletotrichum lentis* virulence on lentil using R/qtl. Red, blue and green dotted lines represent LOD (log of the odds) score thresholds at 0.1, 0.05 and 0.01 significance levels, respectively.

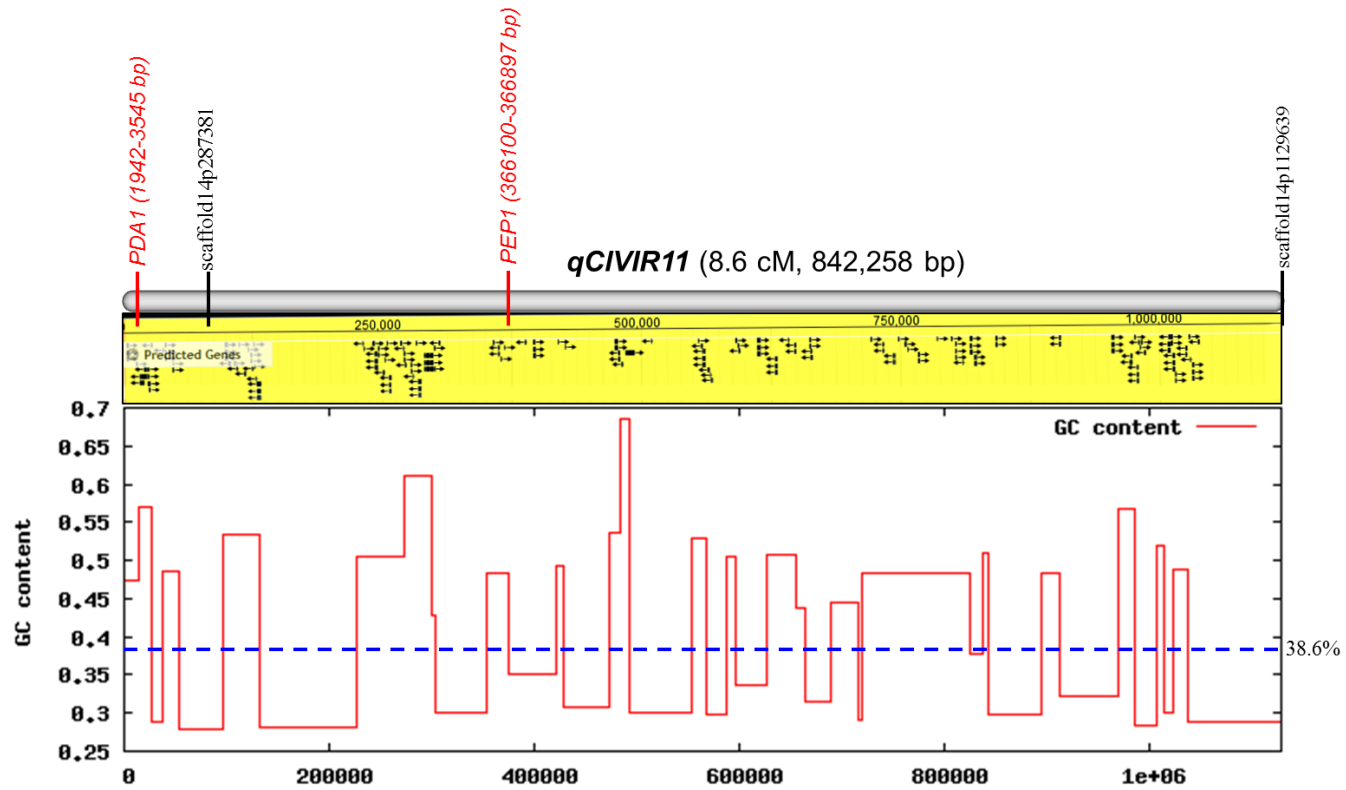

**Fig. S4** *Colletotrichum lentis* minichromosome 11. Bottom, middle and top frames of the figure show GC content, gene density and QTL (*qCIVIR11*) position.

## References

**Broman KW, Wu H, Churchill GA. 2003.** R/qtl: QTL mapping in experimental crosses. *Bioinformatics* 19: 889-890.

**Kozik A, Michelmore R. 2006.** Suite of Python MadMapper scripts for quality control of genetic markers, group analysis and inference of linear order of markers on linkage groups. URL <http://cgpdb.ucdavis.edu/XLinkage/MadMapper/>.

[accessed 11 December 2015].

## ***New Phytologist* Supporting information**

**Article title: Genetic map-guided genome assembly reveals a virulence-governing minichromosome in the lentil anthracnose pathogen *Colletotrichum lentis***

Authors: Vijai Bhadauria, Ron MacLachlan, Curtis Pozniak, Aurelie Cohen-Skalie, Li Li, Jerlene Halliday, Sabine Banniza

Article acceptance date: 02 July 2018

The following Supporting Information is available for this article:

**Notes S1 RNA-Seq data analysis. Below is the entire procedure used to identify differentially expressed genes in *Colletotrichum lentis* isolate CT-30-infected tissues of lentil cultivar Eston.**

RNA-Seq data analysis was done following a pipeline described by [Haas et al. 2013](#). The analysis is primarily based on the Trinity assembly and analysis pipeline ([Grabherr et al. 2011](#)).

### Quality control

Paired-end reads (2x125 bp) were clipped from the 3-prime ends to have a quality score of  $\geq 30$  using the Trimmomatic software package ([Bolger et al. 2014](#); Table 1).



**Table 1.** Read statistic before and after quality control.

| Sample <sup>1</sup> | Read set <sup>2</sup>            | PE reads <sup>3</sup> | PE reads after quality control <sup>4</sup> | %PE reads after quality control <sup>5</sup> |
|---------------------|----------------------------------|-----------------------|---------------------------------------------|----------------------------------------------|
| 23hpi-I             | 23hpi-I.MPS12302102-C10.3648.6   | 79,716,513            | 63,890,278                                  | 80.1                                         |
| 23hpi-II            | 23hpi-II.MPS12302102-D10.3648.6  | 89,351,382            | 73,282,859                                  | 82.0                                         |
| 23hpi-III           | 23hpi-III.MPS12302102-E10.3648.6 | 75,714,608            | 62,948,632                                  | 83.1                                         |
| 96hpi-I             | 96hpi-I.MPS12302102-A11.3648.7   | 25,540,331            | 18,973,304                                  | 74.3                                         |
| 55hpi-III           | 55hpi-III.MPS12302102-H10.3648.7 | 23,319,338            | 19,528,056                                  | 83.7                                         |
| 96hpi-III           | 96hpi-III.MPS12302102-C11.3648.7 | 25,076,218            | 20,130,102                                  | 80.3                                         |
| 96hpi-II            | 96hpi-II.MPS12302102-B11.3648.7  | 43,514,017            | 34,341,835                                  | 78.9                                         |
| 55hpi-II            | 55hpi-II.MPS12302102-G10.3648.7  | 26,456,859            | 22,114,141                                  | 83.6                                         |
| 55hpi-I             | 55hpi-I.MPS12302102-F10.3648.7   | 26,695,514            | 22,235,259                                  | 83.3                                         |
| Myc-II              | Myc-II.MPS12302102-A10.3648.7    | 26,417,771            | 20,125,499                                  | 76.2                                         |
| Myc-I               | Myc-I.MPS12302102-H09.3648.7     | 24,607,486            | 19,662,840                                  | 79.9                                         |
| Myc-III             | Myc-III.MPS12302102-B10.3648.7   | 27,578,722            | 21,169,800                                  | 76.8                                         |
| Myc-I               | Myc-I.MPS12302102-H09.3648.8     | 24,176,050            | 19,312,394                                  | 79.9                                         |
| Myc-II              | Myc-II.MPS12302102-A10.3648.8    | 25,914,154            | 19,735,746                                  | 76.2                                         |
| 55hpi-I             | 55hpi-I.MPS12302102-F10.3648.8   | 26,757,131            | 22,278,697                                  | 83.3                                         |
| 55hpi-II            | 55hpi-II.MPS12302102-G10.3648.8  | 28,041,493            | 23,432,745                                  | 83.6                                         |
| 55hpi-III           | 55hpi-III.MPS12302102-H10.3648.8 | 24,681,539            | 20,664,241                                  | 83.7                                         |
| 96hpi-II            | 96hpi-II.MPS12302102-B11.3648.8  | 43,261,765            | 34,127,130                                  | 78.9                                         |
| 96hpi-I             | 96hpi-I.MPS12302102-A11.3648.8   | 27,411,006            | 20,360,398                                  | 74.3                                         |

|           |                                  |            |            |      |
|-----------|----------------------------------|------------|------------|------|
| 96hpi-III | 96hpi-III.MPS12302102-C11.3648.8 | 25,436,884 | 20,400,061 | 80.2 |
| Myc-III   | Myc-III.MPS12302102-B10.3648.8   | 26,949,699 | 20,670,244 | 76.7 |

<sup>1</sup>23 hpi (appressoria-assisted penetration phase), 55 hpi (biotrophic phase) and 96 hpi (necrotrophic phase) and Myc (vegetative mycelia)

<sup>2</sup>Raw 125 bp paired-end reads generated from the Illumina HiSeq platform

<sup>3</sup>Number of paired-end reads survived after quality control

<sup>4</sup>Percentage of survived paired-end reads

### De novo transcriptome assembly and annotation

High-quality paired-end reads (phred score  $\geq 30$ , minimum read length 50) were assembled *de novo* using the Trinity software package (Grabherr et al. 2011; Table 2; Fig. 1). Transcripts were annotated by Trinotate (<https://trinotate.github.io/>), which uses a number of functional annotation methods, such as homology search using BLAST, SwissProt and Uniref90 databases.

**Table 2.** De novo transcriptome assembly.

| Features                      | Value       |
|-------------------------------|-------------|
| Nb. Transcripts               | 216,422     |
| Nb. Components                | 152,169     |
| Total Transcripts Length (bp) | 225,712,952 |
| Min. Transcript Length (bp)   | 201         |
| Median Transcript Length (bp) | 537         |
| Mean Transcript Length (bp)   | 1,043       |
| Max. Transcript Length (bp)   | 1,4729      |
| N50 (bp)                      | 1,933       |

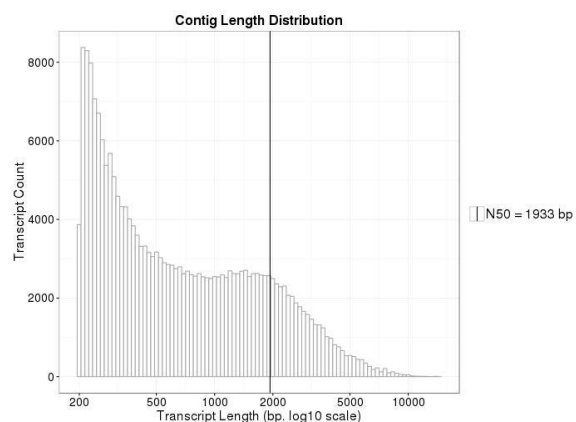

**Figure 1.** Distribution of transcript length.

### Differential gene expression analysis

DESeq ([Anders and Huber 2010](#)) and edgeR ([Robinson et al. 2010](#)) were used to examine the differential expression of transcripts following the below experimental design (Table 3, Table 4):

**Table 3.** Experimental design for the expression analysis.

| Sample    | Myc_v<br>s_23h<br>pi | Myc_vs_55h<br>pi | Myc_vs_96h<br>pi | 23hpi_vs_55<br>hpi | 23hpi_vs_96<br>hpi | 55hpi_vs_96<br>hpi |
|-----------|----------------------|------------------|------------------|--------------------|--------------------|--------------------|
| 23hpi-I   | 2                    | 0                | 0                | 1                  | 1                  | 0                  |
| 23hpi-II  | 2                    | 0                | 0                | 1                  | 1                  | 0                  |
| 23hpi-III | 2                    | 0                | 0                | 1                  | 1                  | 0                  |
| 55hpi-I   | 0                    | 2                | 0                | 2                  | 0                  | 1                  |
| 55hpi-II  | 0                    | 2                | 0                | 2                  | 0                  | 1                  |
| 55hpi-III | 0                    | 2                | 0                | 2                  | 0                  | 1                  |
| 96hpi-I   | 0                    | 0                | 2                | 0                  | 2                  | 2                  |
| 96hpi-II  | 0                    | 0                | 2                | 0                  | 2                  | 2                  |
| 96hpi-III | 0                    | 0                | 2                | 0                  | 2                  | 2                  |

|         |   |   |   |   |   |   |
|---------|---|---|---|---|---|---|
| Myc-I   | 1 | 1 | 1 | 0 | 0 | 0 |
| Myc-II  | 1 | 1 | 1 | 0 | 0 | 0 |
| Myc-III | 1 | 1 | 1 | 0 | 0 | 0 |

0, 1 and 2. If a sample is assigned 0, it is not included in a particular analysis. If a sample is assigned 1, the sample is considered as a member of the control group. If a sample is assigned 2, the sample is considered as a member of the test/case group.

**Table 4.** Snapshot of differentially expressed genes for contrasts.

| Differentially Expressed genes for contrast Myc_vs_23hpi |                        |        |         |               |                  |               |                   |
|----------------------------------------------------------|------------------------|--------|---------|---------------|------------------|---------------|-------------------|
| id                                                       | gene_symbol            | log_FC | log_CPM | deseq.p-value | deseq.adj.pvalue | edger.p.value | edger.adj.p.value |
| TRINITY_DN159362_c0_g1                                   | TRINITY_DN159362_c0_g1 | 19.038 | 13.481  | 0             | 0                | 0             | 0                 |
| TRINITY_DN163150_c1_g1                                   | TRINITY_DN163150_c1_g1 | 19.651 | 13.633  | 0             | 0                | 0             | 0                 |
| TRINITY_DN175612_c0_g1                                   | TRINITY_DN175612_c0_g1 | 19.547 | 13.529  | 0             | 0                | 0             | 0                 |
| TRINITY_DN179977_c0_g1                                   | TRINITY_DN179977_c0_g1 | 19.748 | 13.729  | 0             | 0                | 0             | 0                 |
| TRINITY_DN182678_c0_g1                                   | TRINITY_DN182678_c0_g1 | 19.955 | 13.936  | 0             | 0                | 0             | 0                 |
| TRINITY_DN184450_c0_g1                                   | TRINITY_DN184450_c0_g1 | 21.156 | 13.1    | 0             | 0                | 0             | 0                 |
| TRINITY_DN185405_c0_g1                                   | TRINITY_DN185405_c0_g1 | 21.693 | 13.637  | 0             | 0                | 0             | 0                 |
| TRINITY_DN186078_c0_g3                                   | TRINITY_DN186078_c0_g3 | 22.565 | 14.509  | 0             | 0                | 0             | 0                 |
| TRINITY_DN191213_c0_g1                                   | TRINITY_DN191213_c0_g1 | 20.189 | 14.634  | 0             | 0                | 0             | 0                 |
| TRINITY_DN192168_c0_g1                                   | TRINITY_DN192168_c0_g1 | 21.283 | 13.227  | 0             | 0                | 0             | 0                 |
| Differentially Expressed genes for contrast Myc_vs_55hpi |                        |        |         |               |                  |               |                   |
| id                                                       | gene_symbol            | log_FC | log_CPM | deseq.p-value | deseq.adj.pvalue | edger.p.value | edger.adj.p.value |
| TRINITY_DN194141_c0_g1                                   | TRINITY_DN194141_c0_g1 | 14.908 | 13.853  | 0             | 0                | 0             | 0                 |
| TRINITY_DN200788_c0_g2                                   | TRINITY_DN200788_c0_g2 | 15.497 | 13.418  | 0             | 0                | 0             | 0                 |
| TRINITY_DN203527_c2_g1                                   | TRINITY_DN203527_c2_g1 | 15.183 | 13.766  | 0             | 0                | 0             | 0                 |

| Differentially Expressed genes for contrast Myc_vs_55hpi   |                        |        |         |               |                  |               |                   |
|------------------------------------------------------------|------------------------|--------|---------|---------------|------------------|---------------|-------------------|
| id                                                         | gene_symbol            | log_FC | log_CPM | deseq.p-value | deseq.adj.pvalue | edger.p.value | edger.adj.p.value |
| TRINITY_DN205185_c1_g1                                     | TRINITY_DN205185_c1_g1 | 15.571 | 13.921  | 0             | 0                | 0             | 0                 |
| TRINITY_DN194141_c0_g2                                     | TRINITY_DN194141_c0_g2 | 15.704 | 12.389  | 5.5e-255      | 2.2e-251         | 0             | 0                 |
| TRINITY_DN201375_c0_g1                                     | TRINITY_DN201375_c0_g1 | 15.028 | 12.336  | 2.7e-251      | 9e-248           | 0             | 0                 |
| TRINITY_DN204230_c4_g2                                     | TRINITY_DN204230_c4_g2 | 14.954 | 12.274  | 8.4e-248      | 2.4e-244         | 0             | 0                 |
| TRINITY_DN188479_c0_g2                                     | TRINITY_DN188479_c0_g2 | 15.464 | 12.146  | 3.3e-247      | 8.1e-244         | 0             | 0                 |
| TRINITY_DN199147_c0_g2                                     | TRINITY_DN199147_c0_g2 | 14.658 | 12.204  | 2e-244        | 4.4e-241         | 0             | 0                 |
| TRINITY_DN201190_c0_g1                                     | TRINITY_DN201190_c0_g1 | 14.465 | 12.006  | 3.4e-240      | 6.9e-237         | 0             | 0                 |
| Differentially Expressed genes for contrast Myc_vs_96hpi   |                        |        |         |               |                  |               |                   |
| id                                                         | gene_symbol            | log_FC | log_CPM | deseq.p-value | deseq.adj.pvalue | edger.p.value | edger.adj.p.value |
| TRINITY_DN10491_c0_g1                                      | TRINITY_DN10491_c0_g1  | 14.036 | 8.948   | 0             | 0                | 0             | 0                 |
| TRINITY_DN110236_c0_g1                                     | TRINITY_DN110236_c0_g1 | 12.965 | 7.885   | 0             | 0                | 0             | 0                 |
| TRINITY_DN110722_c0_g1                                     | TRINITY_DN110722_c0_g1 | 10.442 | 9.049   | 0             | 0                | 0             | 0                 |
| TRINITY_DN115590_c0_g1                                     | TRINITY_DN115590_c0_g1 | -6.514 | 8.709   | 0             | 0                | 0             | 0                 |
| TRINITY_DN14896_c0_g1                                      | TRINITY_DN14896_c0_g1  | 5.502  | 9.087   | 0             | 0                | 0             | 0                 |
| TRINITY_DN159438_c0_g1                                     | TRINITY_DN159438_c0_g1 | -5.721 | 9.729   | 0             | 0                | 0             | 0                 |
| TRINITY_DN159559_c0_g2                                     | TRINITY_DN159559_c0_g2 | 10.795 | 9.401   | 0             | 0                | 0             | 0                 |
| TRINITY_DN161263_c0_g1                                     | TRINITY_DN161263_c0_g1 | 11.137 | 8.852   | 0             | 0                | 0             | 0                 |
| TRINITY_DN162110_c0_g1                                     | TRINITY_DN162110_c0_g1 | 8.014  | 8.54    | 0             | 0                | 0             | 0                 |
| TRINITY_DN164844_c0_g1                                     | TRINITY_DN164844_c0_g1 | 10.06  | 8.295   | 0             | 0                | 0             | 0                 |
| Differentially Expressed genes for contrast 23hpi_vs_55hpi |                        |        |         |               |                  |               |                   |
| id                                                         | gene_symbol            | log_FC | log_CPM | deseq.p-value | deseq.adj.pvalue | edger.p.value | edger.adj.p.value |

## Differentially Expressed genes for contrast 23hpi\_vs\_55hpi

| id                     | gene_symbol            | log_FC | log_CPM | deseq.p-value | deseq.adj.pvalue | edger.p.value | edger.adj.p.value |
|------------------------|------------------------|--------|---------|---------------|------------------|---------------|-------------------|
| TRINITY_DN191680_c0_g2 | TRINITY_DN191680_c0_g2 | 7.501  | 7.117   | 0             | 0                | 7.2e-302      | 5.2e-297          |
| TRINITY_DN199868_c2_g1 | TRINITY_DN199868_c2_g1 | 9.054  | 7.524   | 0             | 0                | 1.5e-279      | 5.6e-275          |
| TRINITY_DN190033_c0_g1 | TRINITY_DN190033_c0_g1 | 10.233 | 7.252   | 6.1e-107      | 1.4e-103         | 3.9e-254      | 9.3e-250          |
| TRINITY_DN230825_c0_g1 | TRINITY_DN230825_c0_g1 | -7.34  | 9.217   | 5.3e-119      | 1.8e-115         | 5.9e-248      | 1.1e-243          |
| TRINITY_DN173194_c0_g1 | TRINITY_DN173194_c0_g1 | 15.382 | 6.593   | 0             | 0                | 8.3e-245      | 1.2e-240          |
| TRINITY_DN195988_c0_g2 | TRINITY_DN195988_c0_g2 | -5.409 | 11.161  | 0             | 0                | 2.6e-244      | 3.2e-240          |
| TRINITY_DN173954_c0_g1 | TRINITY_DN173954_c0_g1 | -7.444 | 8.994   | 7.6e-117      | 2.3e-113         | 3.3e-238      | 3.4e-234          |
| TRINITY_DN183140_c0_g2 | TRINITY_DN183140_c0_g2 | 9.941  | 6.518   | 5.1e-150      | 3.4e-146         | 3.5e-237      | 3.2e-233          |
| TRINITY_DN35064_c0_g1  | TRINITY_DN35064_c0_g1  | 7.51   | 6.467   | 2.3e-79       | 2.2e-76          | 2e-226        | 1.6e-222          |
| TRINITY_DN199220_c0_g3 | TRINITY_DN199220_c0_g3 | 6.89   | 6.207   | 7.8e-107      | 1.7e-103         | 2e-216        | 1.5e-212          |

## Differentially Expressed genes for contrast 23hpi\_vs\_96hpi

| id                     | gene_symbol            | log_FC | log_CPM | deseq.p-value | deseq.adj.pvalue | edger.p.value | edger.adj.p.value |
|------------------------|------------------------|--------|---------|---------------|------------------|---------------|-------------------|
| TRINITY_DN15951_c0_g1  | TRINITY_DN15951_c0_g1  | 9.849  | 8.99    | 0             | 0                | 0             | 0                 |
| TRINITY_DN182724_c0_g2 | TRINITY_DN182724_c0_g2 | 9.216  | 8.1     | 0             | 0                | 0             | 0                 |
| TRINITY_DN185504_c0_g1 | TRINITY_DN185504_c0_g1 | 9.174  | 7.964   | 0             | 0                | 0             | 0                 |
| TRINITY_DN186556_c0_g1 | TRINITY_DN186556_c0_g1 | 8.338  | 8.993   | 0             | 0                | 0             | 0                 |
| TRINITY_DN187162_c0_g1 | TRINITY_DN187162_c0_g1 | 9.286  | 7.92    | 0             | 0                | 0             | 0                 |
| TRINITY_DN191663_c0_g1 | TRINITY_DN191663_c0_g1 | 9.165  | 8.358   | 0             | 0                | 0             | 0                 |
| TRINITY_DN192155_c1_g1 | TRINITY_DN192155_c1_g1 | 18.383 | 8.943   | 0             | 0                | 0             | 0                 |
| TRINITY_DN201204_c0_g2 | TRINITY_DN201204_c0_g2 | 16.462 | 11.147  | 0             | 0                | 0             | 0                 |
| TRINITY_DN219047_c0_g1 | TRINITY_DN219047_c0_g1 | 13.189 | 9.468   | 0             | 0                | 0             | 0                 |
| TRINITY_DN10491_c0_g1  | TRINITY_DN10491_c0_g1  | 18.904 | 9.467   | NA            | NA               | 0             | 0                 |

| Differentially Expressed genes for contrast 55hpi_vs_96hpi |                        |        |         |               |                  |               |                   |
|------------------------------------------------------------|------------------------|--------|---------|---------------|------------------|---------------|-------------------|
| id                                                         | gene_symbol            | log_FC | log_CPM | deseq.p-value | deseq.adj.pvalue | edger.p.value | edger.adj.p.value |
| TRINITY_DN10491_c0_g1                                      | TRINITY_DN10491_c0_g1  | 11.862 | 9.98    | 0             | 0                | 0             | 0                 |
| TRINITY_DN110722_c0_g1                                     | TRINITY_DN110722_c0_g1 | 13.078 | 10.082  | 0             | 0                | 0             | 0                 |
| TRINITY_DN14896_c0_g1                                      | TRINITY_DN14896_c0_g1  | 10.795 | 10.089  | 0             | 0                | 0             | 0                 |
| TRINITY_DN156182_c0_g2                                     | TRINITY_DN156182_c0_g2 | 11.265 | 8.734   | 0             | 0                | 0             | 0                 |
| TRINITY_DN159559_c0_g2                                     | TRINITY_DN159559_c0_g2 | 12.601 | 10.436  | 0             | 0                | 0             | 0                 |
| TRINITY_DN161263_c0_g1                                     | TRINITY_DN161263_c0_g1 | 12.047 | 9.881   | 0             | 0                | 0             | 0                 |
| TRINITY_DN161449_c0_g1                                     | TRINITY_DN161449_c0_g1 | 7.954  | 8.623   | 0             | 0                | 0             | 0                 |
| TRINITY_DN162110_c0_g1                                     | TRINITY_DN162110_c0_g1 | 11.442 | 9.563   | 0             | 0                | 0             | 0                 |
| TRINITY_DN171252_c0_g1                                     | TRINITY_DN171252_c0_g1 | 11.94  | 10.683  | 0             | 0                | 0             | 0                 |
| TRINITY_DN176858_c0_g1                                     | TRINITY_DN176858_c0_g1 | 9.424  | 10.487  | 0             | 0                | 0             | 0                 |

<sup>1</sup>Gene: component id

<sup>2</sup>Symbol: BLAST protein database id if available, component id otherwise

<sup>3</sup>log\_FC: log2 Fold Change of gene level expression

<sup>4</sup>log\_CPM: log2 Counts Per Million of gene level expression

<sup>5</sup>deseq.p-value: DESeq nominal p-value

<sup>6</sup>deseq.adj.pvalue: DESeq False Discovery Rate (FDR) adjusted p-value

<sup>7</sup>edger.p-value: edgeR nominal p-value

<sup>8</sup>edger.adj.pvalue: edgeR False Discovery Rate (FDR) adjusted p-value

## References

**Anders S, Huber W. 2010.** Differential Expression Analysis for Sequence Count Data. *Genome Biology* **11**: R106.

**Bolger AM, Lohse M, Usadel B. 2014.** Trimmomatic: A Flexible Trimmer for Illumina Sequence Data. *Bioinformatics* **30**:

2114-2120.

**Grabherr MG, Haas BJ, Yassour M, Levin JZ, Thompson DA, Amit I et al. 2011.** Full-length transcriptome assembly from RNA-Seq data without a reference genome. *Nature Biotechnology* **29**: 644-652.

**Haas BJ, Papanicolaou A, Yassour M, Grabherr M, Blood PD, Bowden J et al. 2013.** De novo transcript sequence reconstruction from RNA-Seq Using the Trinity platform for reference generation and analysis. *Nature Protocols* **8**: 1494-1512.

**Robinson MD, McCarthy DJ, Smyth GK. 2010.** EdgeR: A bioconductor package for differential expression analysis of digital gene expression data. *Bioinformatics* **26**: 139-140.
